# Supplementary material for: Comparison of Olfactory Genes in Two Ectropis Species: Emphasis on Candidates Involved in the Detection of Type-II Sex Pheromones
Source: Front Physiol. 2018 Nov 14;9:1602. doi: 10.3389/fphys.2018.01602 (PMC6247094; doi:10.3389/fphys.2018.01602)
Supplement: Supplementary file 1 [file Table_1.xlsx]

## Sheet: Sheet1
Supplementary Table 1 The primers used for qPCR.
Gene name	Forward primer	Revese primer
Odorant binding proteins (OBPs)
EoblOBP1	AGGACTCCAGGATACACCAC	GTCATCGTACTGCTGCTCAC
EoblOBP2	CTTCCAGACGCCGTAACTAA	GCTTCAGACCTTCATCCAAGA
EoblOBP3	AGAGAATGTTCGCAGGAAGTAAT	TCCTCGTGCCAGAAATTGAA
EoblOBP4	GCTGTGACATACCAGAATTAGGA	GCGGAGATGTGCCTTGTAT
EoblOBP7	CCTCCAATGAAGCCTCCATC	TTGTGCCGTCGTCTGAAG
EoblOBP8	ATTACTTTACCACCCGAGATAGC	TCCTTCACGAATCATGCGAATA
EoblOBP9	TTGCGATGCGATGACCAA	TTCCCCTTTTCAATCTGCGATA
EoblOBP10	CGATGACGAGACAGCAACT	CCACATAACACATGACTCTACGA
EoblOBP11	ACTGAACTACGAGGCTGCTA	TGGTGGTATGGAACGATGC
EoblOBP12	TCATCGCTGTGGCATACTG	TTCGCAATTCGTTATATCCTCCT
EoblOBP13	TTAGTCCAGATGGCAAACTCAA	AATACTTCATAGGCGGTGTCAG
EoblOBP14	ATGACGAAGGATGGCAAGTT	GGTCTGCTGAGGAGTGTTG
EoblOBP15	GTAGGCTGCTGACTGTACTG	CACGGAACATTGCTTTCTCTG
EoblOBP16	CCGCCTATGGACGAAGAC	TCACGCACTTGATGTAGCAT
EoblOBP17	TCCTTGCTTCTATGCGTGTT	GTACCATCTCCTACTGTCTTGTC
EoblOBP18	GAGGTGGCTAAATCGGAACA	GAATATCCTTGTGCTCAGTCAGA
EoblOBP19	ACGCAGAGGAACTCAAGATG	GGTGGATGATTCGTAGTTACAGAT
EoblOBP20	TGCGAGTGTTGTGGTGAA	TTGTTTCTGAAGGCTTGAATGTG
EoblOBP21	CGAAGGACAAGAGGACTTACAA	CCAGATAGGCTTCAGCAGATT
EoblOBP22	GAGATGACGGAACTGATGCTAT	TCATAACGCCTTCCATCCTATAAG
EoblOBP23	TCTGTTAGTTGGTGCTTGCTAT	CGGTGCTATGGTGTAATCCTT
EoblOBP24	TTCATTGAGCGATAGTGCGATA	TCTTGGCATAATGTGATGACTCT
EoblOBP25	TCTGGAAGCCTGACTACGA	ATTCTCGCAGTTGTGGATGAT
EoblOBP26	GTGGCGTGCATTTACAAGAG	TGGCATACATTTGGCGACT
EoblOBP27	GCTGCGTATCTAGTCGTCTC	ATGCTGAATGTCCTCCATAGAAG
EoblOBP29	GGAGGAGTTCTTCCACTTCTG	GTCGGTGAGCAGGTTGAA
EoblOBP31	CGAAAGCCTTGTATGATGAAGTG	CTATCTTGCCGTCGTCCATT
EoblOBP32	AGGACTTCATCTTCTGTTGCTAC	GAGAACCACATCGCCTGAT
EoblOBP33	GACGACATTGCCAAAGTAAAGAA	CCAGACTCTTGTTCTCCATCAA
EoblOBP34	AATGATGGCGATGCTCTGAA	GTGAATGAACTTCTTGTGTCCTTC
EoblOBP36	CGCCAAAGAGTCCAATCCT	TGCCGTATCCATCGTAATCG
EoblOBP37	ACCACTGGCAGATTAAGAGC	TCCATCACCACTTCGTTACTG
EoblOBP38	AGTTCAAAACGGCTACAAGGA	GTACTGGGATCTGCTTCATACAA
C6102	GCACTCACGACAAAGATTACAC	AGGAAATACAGCAGCCGATT
C11612	CCACTGACGAGGATGTAATGAA	TCACACCTTCCAAGTTGATTCT
C15995	GCCACCGAAGACCAAGTAG	CGTATCCAGTTGCCTTCCA
C39094	GTCGTTCGGTTCGGAAGT	CGGAGAAGAAGGCGTCAG
EgriOBP1	GACAGCCGAGGTGATGAG	GCCAGAAGTGTTGGAACTCT
EgriOBP2	GAACTCTTGGATGAAGGTCTGAA	CTGAGGTCGTGGATCTTGAG
EgriOBP3	ACGATGATACACGATTGCGA	TAGACGGAGCCCACTTCA
EgriOBP4	CAGTGGGCAGAGAAGCATAA	CAAGTGAAGACATCATAAGCAGTG
EgriOBP5	TGAGAGTGCTCGTGATATTCG	TTATCCTTGTCGCAGGTTGAA
EgriOBP6	GTAGAGGCACGCCATCAG	GTGTGGAGGACCTTGTTCTT
EgriOBP7	AGCCTCCATCCGACGATA	ATCTTCTGCCATCTTCTTCTTGT
EgriOBP8	TGAAATAGTGAGAACAGCCATCA	ATGCGAATAATGTCTGGAACTCT
EgriOBP9	CGATGACCAAAGAGCAATTAAGAA	CGCCGACTCGTAACTCAG
EgriOBP10	CGATGACGAGACAGCAACT	CCACATAACACATGACTCTACGA
EgriOBP11	GAGCACGGGCAAAATGATG	GCAGCCTCGTAGTTCAGTT
EgriOBP12	TCATCGCTGTGGCATACTG	TTCGCAATTCGTTATATCCTCCT
EgriOBP13	GGCAGGAATCATTAGTCCAGAT	AATACTTCATAGGCGGTGTCAG
EgriOBP14	ATGACGAAGGATGGCAAGTT	GCTGTCTGCTGAGGAGTG
EgriOBP15	ATCGGCTTGTAAGAACTGTGT	TCCATTGAGCAGCGTGTC
EgriOBP16	GGATTATTAGATGATAAAACCCGAGC	CGTCTTGCCAGCATTTCTG
EgriOBP17	TCCTTGCTTCTATGCGTGTT	TACCGTCTCCTACTGTCTTGT
EgriOBP18	GCCGTCTTCAGCGTGGCTTCAG	CTCCGTGTTCTTTGCCGCACTCTG
EgriOBP19	GGCCCAGAGGCTCCTTGCTTCC	GCCATCGCTAACGGGTTCGGTGTT
EgriOBP20	GCTGCGAGTGTTGTGTTG	TGAAGGCTTGAATGTGATCCA
EgriOBP21	CGAAGGACAAGAGGACTTACAA	GACAGATAGGCTTCAGCAGATT
EgriOBP22	CACGAAAGACCACCCTGTAG	GTCATAACGCCTTCCATCCTAT
EgriOBP23	TGGGTTGAGACAGAGTTTAGC	TCAAGAGATATGCTCGTTCACAA
EgriOBP24	TTCATTGAGCGATAGTGCGATA	TCTTGGCATAATGTGATGACTCT
EgriOBP25	GGTGGATGCGGACTCAAA	CTTGGTGGAGAGGCAGTG
EgriOBP26	GTGGCGTGCATTTACAAGAG	ACTGGCATACATTTGGTGACT
EgriOBP27	ACGCTGTGTATGCTTACTCC	TCGTTCTCTTGGACCTGTTATTAG
EgriOBP28	AAGGAAGCGTACAGCAATCA	CAAGCGGACTCTGGACATT
EgriOBP29	AGGACGTGATGGAGGAGTT	CGGTGAGCAGGTTGAAGT
EgriOBP30	AAGATGGCGTTCCAGATAGATAC	GACAAGCACATTAGGAGGTTCT
EgriOBP31	GGACGACGGCAAGATAGAC	CCATTTCGCAGTGACATTTCTC
EgriOBP32	AGGACTTCATCTTCTGTTGCTAC	GAGAACCACATCGCCTGAT
EgriOBP33	GGCATACCGTCCGAAGATT	TCTTTACTTTGGCAATGTCATCAG
EgriOBP34	ATGCTTCTACGCTTGCTTCT	GTGAATGAACTTCTTGTGTCCTTC
EgriOBP35	ATCGGTGAGGATGTGATTCG	GACCTTCTTCTTGTCCACTTGA
EgriOBP36	CGCCAAAGAGTCCAATCCT	TGCCGTATCCATCGTAATCG
EgriOBP37	GCATTGATAGTGACGCCATTG	CCACATCGCCGTATTCCTT
EgriOBP38	GTGGCGTGCATTTACAAGAG	ACTGGCATACATTTGGTGACT
EgriOBP39	GTTCAGGATGGATGTGGCTAT	TATGGCGGCAGTTTCTTCTT
EgriOBP40	ATGTGGAGCCATGACTGAAC	CGTCGTCTAAGGTGTCTTCTG
Odorant receptors (ORs)
EoblORco	ATGTTCTGTTCGTGGCTGAT	GTCTGTAGTATCTGGCATCTTCTC
EoblOR2	TACCACATGCTCGCTGAAG	ATCCGAAATCCACTCCCAAG
EoblOR3	ACCAAACTGATGAAGAGCACTAT	AACGGTTCCAGTAGCACAAT
EoblOR4	TTACAATGTGTTGGGTGAGAAGA	CAAGGTGAGCAGCGAGAG
EoblOR5	CGACTAATGACGAACGAAGGA	CAACCAGGCAGAGAACCAT
EoblOR6	CAGCGTGTATGCCTTCGTA	TCCTTCTGCCTCTGATCCA
EoblOR7	GCTTACGATGCCGATGAGA	CGACGAGGACTTGATGTTGA
EoblOR8	GAAGCAGCGGCAGTGATA	TTGTGGCAGATGTGAGTTGATA
EoblOR9	CCGTTCAGAGGACTCTCAATC	ACCAGACATATTACCGCAGATG
EoblOR10	TGGCAACTGACAAGCAACT	TGAATAGAGCGAAGGTGAACAG
EoblOR11	TTGGTAATAGCAGGTTTGGTACA	GAGCATCAGAAGCACAGTCT
EoblOR12	AGAGCCTCCAGGATATTATTGTTC	ACAGACCGTTCGCAGATG
EoblOR13	TGAGGATAGCCGACCAACT	ACCGAACACCACAGTCAAG
EoblOR14	CGAACGGAATAAGGAACTGAGA	CTGGTAAGCGGTGACACATAT
EoblOR15	GCAACGAGGTTCTCCACAT	ACCGCCGAGTAACAACAC
EoblOR16	CACTCTGCTGTATGCTGCTA	CCTGCCTGAAGAATAATCTGGT
EoblOR17	GTCTCACTGGATTCAATCTTACGA	GCCTCTGCCAAATACATCTCT
EoblOR18	CAAGGAGTGATAGCCGTAGAATT	TACACCGCTCTTTCAAATACCA
EoblOR19	GTAACCTACCTGTCGGTGATG	GCTAGAGCCTTCTGGAACTG
EoblOR20	CTTGGCGACGATGATACAGATA	AAGGCAGGTAGATGTGGATAAC
EoblOR21	ATTGGTGAAGCAGTGTATTGTTC	CATTCCTCCAGCGGTGAA
EoblOR22	TCCTCTCCAGTGCTCCTAC	TTATCATTAACAACTCCGCTCCA
EoblOR23	ACAACATCATCCGCATAGTATCA	CCCGCAGCATCATCATCA
EoblOR24	TGTAGTTCAGCAATCACGGTAG	GCATGACGAGCACCAAGTA
EoblOR25	GATGTTGTTGATGCTGTTGGTT	ACGTAGAGCGAGAATGTTGTT
EoblOR26	TCTCTGCTTCTTCGCTGATATG	ACAAGGCTTCTGTGCTCTC
EoblOR27	ACACTGCTGACATCTTTGGAA	ATTGTGATTTGATACGCTGTAACG
EoblOR28	AGGAGGACTGCTGCTGTA	GCTGGTATATCTTCTGCCTGAAT
EoblOR29	GCTAACTTCAGTGTCACCATCT	CCATTGATATACGCCACAACATAC
EoblOR30	CGTGTCGCTCGTCATCAT	TATCTCGCCGCTCTCTTCT
EoblOR31	ATGCTAAGGGTGTATTTGGTGAT	CTGTGATGTCTGCTTGTCGTA
EoblOR32	GCGGTTTCATTTGTGTGCTAT	TGGTGATCCTTGATAATGCTATGT
EoblOR34	CTATGGCAGTGGAGTTCAGTT	CCAGTAAGGCAGTCCATCC
EoblOR35	GTTGTGCGAGCCAATAAGC	TCAGTGTGAAGAAGGAGTAAGC
EoblOR36	CGTCTCGTTGCCACTCTAAT	AGTTCTCCGCTGCTTCTTC
EoblOR37	TCAGAGGATGTGTTGGATTATTCA	TAGGCAAGCATACACTCGTAAG
EoblOR38	TACAGCGTACTTCATATTCCTCAC	ATCCTTTCCACAAACACCACTA
EoblOR39	AGCGTATGGGAATGTTACTATGG	ATTCTATCGTCATTGTCTCCGTAG
EoblOR40	TATGCCAGTTCGCTGTGTT	CCAATCTCGTCTTGTACTTCTCA
EoblOR41	CTTCTTGGCGACTCTCACTT	CGGCTGATATGGAACTCTCATTA
EoblOR42	TTCTGATCGGCTTCTTGACTG	GACGGAGGATGCTGTTGTT
EoblOR43	CCTCGTGGTCCTGATGTTC	GTCGGTAGAGACAGACTGATTG
EoblOR44	TACAGGCTGCTACACGATTATG	TTGGAATAAATGACACTGCTATGC
EoblOR45	GGAAGGTGAAGTGGAGTTGATAT	CTGACCAGAACTGATGAACATAGA
EoblOR48	CACACTGCTCTCACCAATCA	AAGCGGTTGTGAACTGGATAA
EoblOR51	CACGATGGACGCCTTCAT	CAGGCAGTCCACGAACAG
EoblOR53	TGGCGTTGTGTGGTGTAAT	ACGACTGTAGTCATTAAACTCTCC
C4657	CTGCCACTCCACTCATACG	TTGCTTGTAGAACTTCTCCAACT
C9034	ATGATGTGGACGCTTGTGAT	TTGGTTATCCTGATGATGTCGTT
EgriORco	ATGTTCTGTTCGTGGCTGAT	GTCTGTAGTATCTGGCATCTTCTC
EgriOR1	GGTCGTGCTGATGATGCT	GCCGTCCAATTCTCCTCTG
EgriOR2	TTGGAACCGATAACTGTGACTC	CATGGTAGCCGTATGCGATAT
EgriOR3	CCTGCGTGTGGATAATGGT	TAATGCTCTTCATCAGTCTGGTC
EgriOR4	GGTGTCCATAGGTGTTCTGATAG	AGAAAGTCCTCAACGCTTCAT
EgriOR5	GACGAACGAAGGAACTCACT	CAACCAGGCAGAGAACCAT
EgriOR6	CCATAGGAATCGCAGCCATAT	ACCATTGAAGTCAAGACCAACT
EgriOR7	TACGATGCCGATGAGAATCTTC	CGACGAGGACTTGATGTTGA
EgriOR8	GGGAGTGAATGGAGTTGGAATC	GTGGCAGATGTGAGTTGATAGG
EgriOR9	CCGTTCAGAGGACTCTCAATC	ACCAGACATATTACCGCAGATG
EgriOR10	CCGTTCCAGCCTGTCTATG	ATCTTGAGAGCGAGCACATC
EgriOR11	GCGATTATTATCCTCTGCTTCAAC	TCCCACAAATACCCACAACTT
EgriOR12	TCAGTGAACCTTACCAGAAGAATC	AGAAACTACAAGCATATCCCAACT
EgriOR13	CGCTGCTACTCCGTCTTC	GCTTCTGATGGTCCTTTACAATTC
EgriOR14	CGAACGGAATAAGGAACTGAGA	CTGGTAAGCGGTGACACATAT
EgriOR15	GGAAGCGGCGAAGAGAAT	AGCACATATCATTAGTGAGCAGAT
EgriOR16	CTTGATATGTACGCCAGTGAGT	AGCAGCATACAGCAGAGTG
EgriOR17	ATCTGTCTCACTGGATTCAATCTT	TTGCCTCTGCCAAATACATCT
EgriOR18	CAAGGAGTGATAGCCGTAGAATT	TTGAAGCGTTCCCAGTTACAT
EgriOR19	CAGCGTTGGATTGATTTGTATGT	CACCAGCAGCAGACGAATA
EgriOR20	TTATCCACATCTACCTGCCTTG	GCCACCATCAGAAGTACCAT
EgriOR21	GTTGCCAGGAGTAAGGTCTAC	GGTGAGAGCACTGTATGAAGTT
EgriOR22	CTTGTACCGCCGTTCCTT	TCTTCGCAGCAAAGTAGTTCT
EgriOR23	ATCATCTGTGCTACTGCTTACC	ACCACTTCAGACGACTCTACT
EgriOR24	CCGAGCAGATGTCATCAACT	ATGCCTAATAAGAGCGTCGTTAT
EgriOR25	CTCGGGAATACTTATCGCCATAT	CCAACAGCATCAACAACATCTT
EgriOR26	CTGTGTATAACTGCCGATGGT	ACGATGTGCTGAGAACTGTC
EgriOR27	GGATGACGCTGAGGCAAT	GATTTGATACGCTGTAACGCATAG
EgriOR28	AGGAGGACTGCTGCTGTA	CTGGTATATCGTCTGCCTGAAT
EgriOR29	TCACCTGGTCTTGCTCCT	CGCTGCCTTACTATATCTTCTTCT
EgriOR30	TCGCTCGTCATCATCTGC	TATCTCGCCGCTCTCTTCT
EgriOR31	ATGCTAAGGGTGTATTTGGTGAT	TTATCCTGTGATGTCTACTTGTCG
EgriOR32	GCGGTTTCATTTGTGTGCTAT	CCAACATTGCTGGTATTAACTCC
EgriOR33	CGAGCGTTGAGACCAGTC	TTCCACATAGCATTCATCAAGTTG
EgriOR34	CTATGGCAGTGGAGTTCAGTT	CGAATATGATGCTTGCGTCAAT
EgriOR35	GCACACTACTTGGATATGAGAGT	GCTTATTGGCTCGCACAAC
EgriOR36	CGTCTCGTTGCCACTCTAAT	AGTTCTCCGCTGCTTCTTC
EgriOR37	TGTCTCGGAGCAATACAAAGTT	GCATCATCAGCACCAGGTA
EgriOR38	CTCGTCACTTTCAGAGGCTATT	AGGCGGTGATTGATAATGGTT
EgriOR39	ACTGATGTCTCGCCTGTTG	GCTTGTAGAGTAATCGCTATGGA
EgriOR40	TCTACTTCTTCAGCCAACCTC	GGAGAACTTGTCCACCAGC
EgriOR41	GCGGTCTGGTGTCTAAGTC	CTGAATGAAGGAGGGCAAGT
EgriOR42	CGAACCAAACAACAGCATCC	AACCATCATCACGAGCAGAG
EgriOR43	GCTCGTATGTATGTGCTCTGT	TCACACTCGTTAGCCACTTG
EgriOR44	TTATGATGCTGAGCTACGTGATT	AGGTTATGTGTCGGTGTTATGT
EgriOR45	TCAAGTCTTGTTGGAGCAATCTA	TCTATGTTCATCAGTTCTGGTCAG
EgriOR46	ACAACGCCACCATGTAATAGT	AGGAATGAGGTTTGGGATGTC
EgriOR47	AGTCGCAATCATGTCTTATCTCA	AAGCGGTTGTGAACTGGAT
EgriOR48	TTTGGTGGAAACGGGATTACA	CACGCCTCTGTCAACTGT
EgriOR49	ACTTGTCACGATGTTAGCAATAGA	CTAGCCGTACAGATGAAGAGTC
EgriOR50	TGGAATCAACATAAGAAGTGGAGA	AGGTCAACGAAATGCAAGGA
EgriOR51	CTACGAAGTTGGTTCAGGACATA	GCAGGCTGACGATCTTGT
EgriOR52	CACGGAATAGGAGCCATCAG	TCGGTAAGAGAAAGTCAGTATGC
EgriOR53	ACAGCCTTGGTGGTTGAC	AGCAGCATTCGTTTAGTTTCTTG
EgriOR54	CGGCGTCTCCTATTGATAGC	ACAGTGTAGAGTGTGTATGATGAC
EgriOR55	CGGTGGCGATGAACAAGA	TGGTTGAGTTGGCAGTTGT
EgriOR56	CCGATAGTGCTGCTTGATGA	GAACCCGAACTGTCTCTCTG
EgriOR57	CGTCGTGTTACCATTCCTGTA	CCCAGATGAGGTGTTTGCT
EgriOR58	CCTGGAGGCTTCAGTATGC	GAGAGGTGGTCCGATTACAAC
